# Supplementary material for: Mechanical Forces between Mycobacterial Antigen 85 Complex and Fibronectin
Source: Cells. 2020 Mar 14;9(3):716. doi: 10.3390/cells9030716 (PMC7140604; doi:10.3390/cells9030716)
Supplement: Supplementary file 1 [file cells-09-00716-s001.pdf]

Article

# Mechanical Forces between Mycobacterial Antigen 85 Complex and Fibronectin

Albertus Viljoen <sup>1</sup>, David Alsteens <sup>1,2</sup> and Yves F. Dufrêne <sup>1,2,\*</sup>

<sup>1</sup> Louvain Institute of Biomolecular Science and Technology, UCLouvain, Croix du Sud, 4-5, bte L7.07.07, B-1348 Louvain-la-Neuve, Belgium; [albertus.viljoen@uclouvain.be](mailto:albertus.viljoen@uclouvain.be) (A.V.); [david.alsteens@uclouvain.be](mailto:david.alsteens@uclouvain.be) (D.A.)

<sup>2</sup> Walloon Excellence in Life sciences and Biotechnology (WELBIO), Belgium

\* Correspondence: [yves.dufrene@uclouvain.be](mailto:yves.dufrene@uclouvain.be)

## Supplementary Data

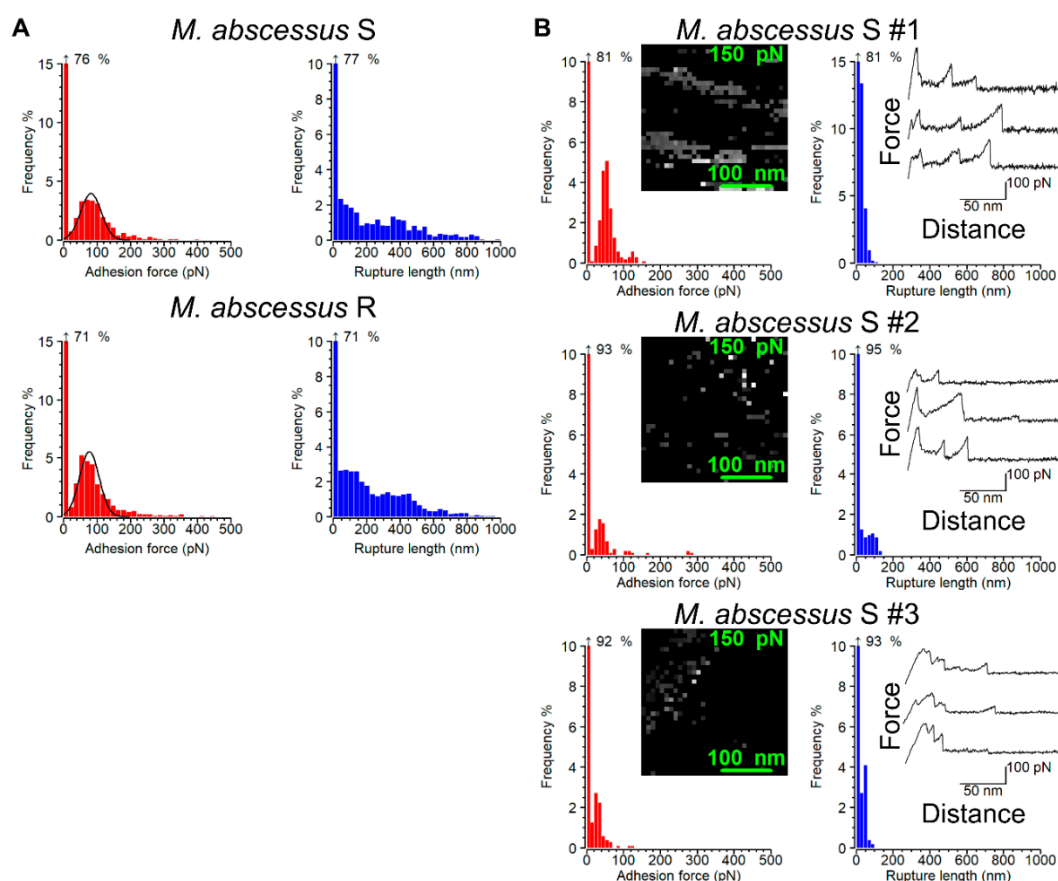

**Figure S1.** Ag85-Fn force interactions in *M. abscessus* S cells. (A) Adhesion force (left) and rupture length histograms (right) of single bacterium-Fn interactions shows moderately lower binding frequencies for S variant cells (top panel) compared to R variant cells (bottom panel). Histograms were drawn from the combined force-distance curve data from 7 cells of each variant. (B) Single Fn-molecule and Ag85 interactions on top of *M. abscessus* S variant cells occur significantly less frequently compared with *M. abscessus* R variant cells. Shown is adhesion force histograms (left) and maps (inset) as well as rupture length histograms (right) and three representative force-distance curves originating from the same dataset for three *M. abscessus* S cells from a total of 5 cells showing a similar trend.
